# Supplementary material for: A gradient of Wnt activity positions the neurosensory domains of the inner ear
Source: eLife. 2021 Mar 11;10:e59540. doi: 10.7554/eLife.59540 (PMC7993990; doi:10.7554/eLife.59540)
Supplement: Figure 1—source data 1. [file elife-59540-fig1-data1.xlsx]

## Sheet: Sheet 1
Fluorescence_intensity
