# Supplementary figures and images for: A gradient of Wnt activity positions the neurosensory domains of the inner ear
Source: eLife journal article supplement (doi:10.7554/elife.59540), 2021-03-11

# 5TCF::H2B-RFP

T2-EGFP

pNICD1-EGFP

pDN-MAML1-EGFP

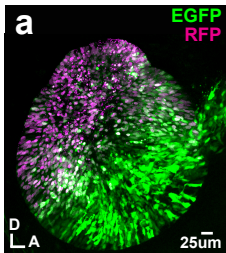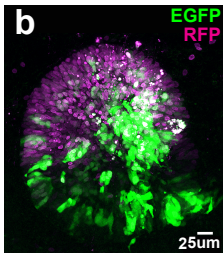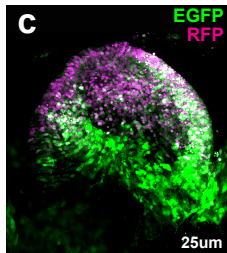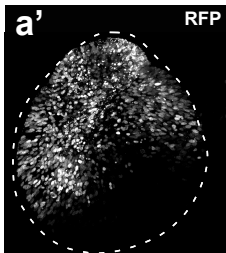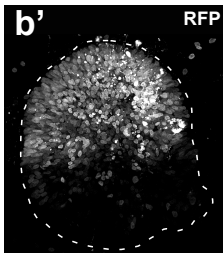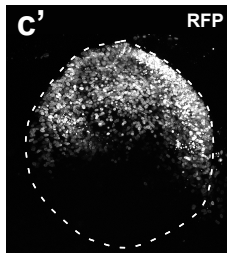

Supplement: supp [file elife_poa_e59540_Figure_2_figure_supplement_1.pdf › elife_poa_e59540_Figure_2_figure_supplement_1.pdf]

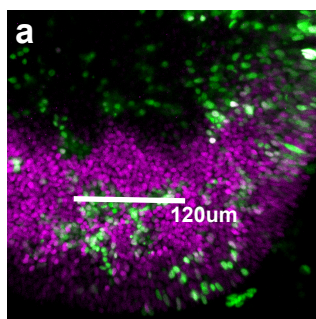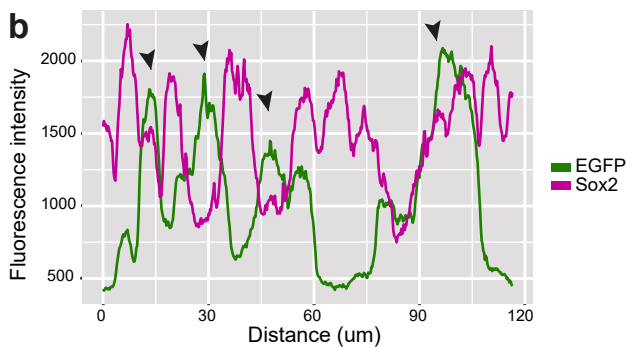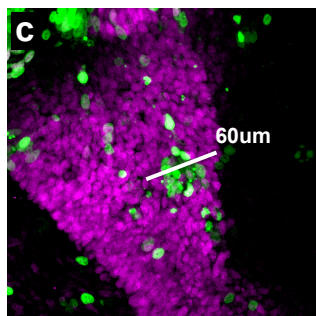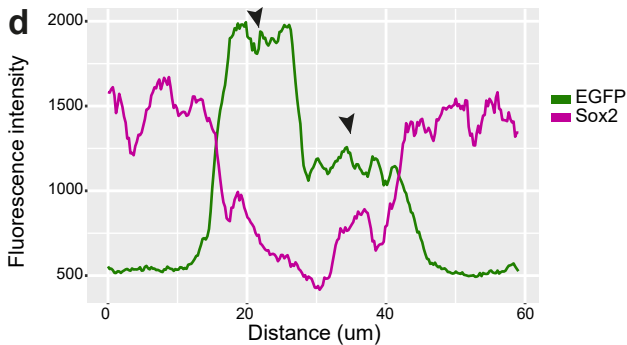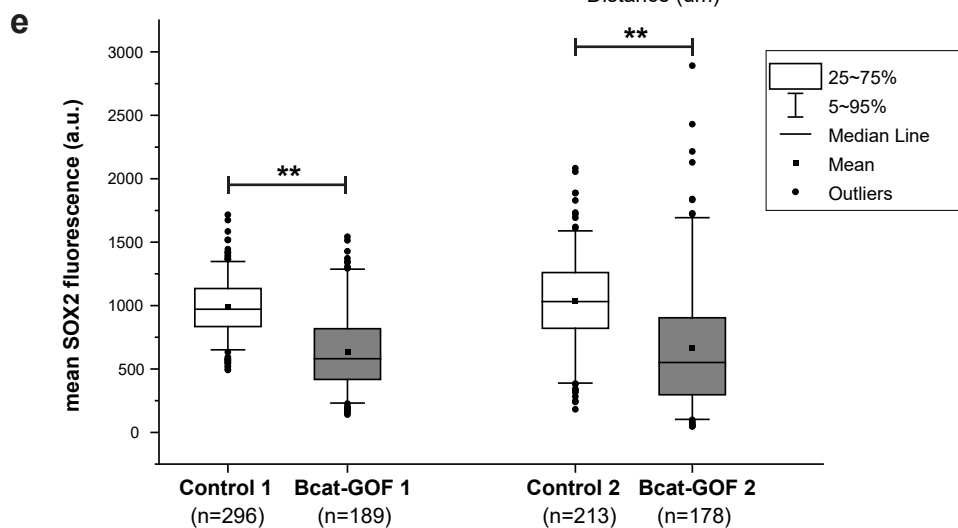

Supplement: supp [file elife_poa_e59540_Figure_3_figure_supplement_1.pdf › elife_poa_e59540_Figure_3_figure_supplement_1.pdf]

pDN-MAML1-EGFP + T2- $\beta$ cat-LOF

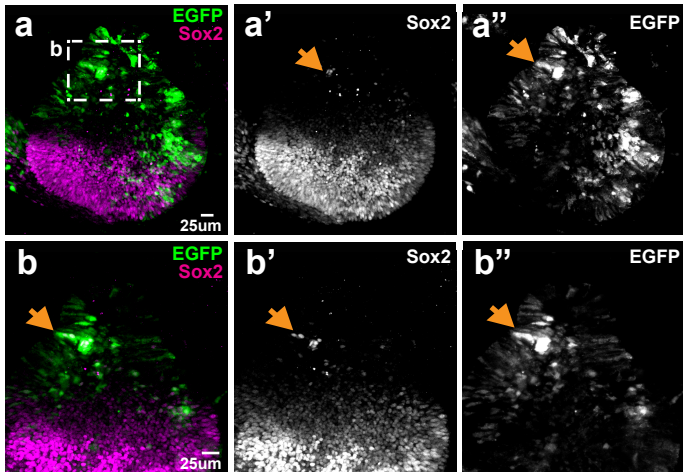

Supplement: supp [file elife_poa_e59540_Figure_3_figure_supplement_2.pdf › elife_poa_e59540_Figure_3_figure_supplement_2.pdf]

T2-mCherry

T2- $\beta$ cat-LOF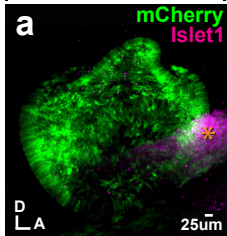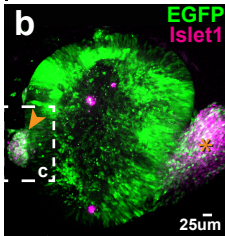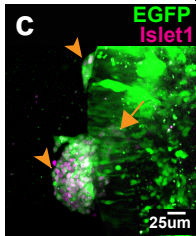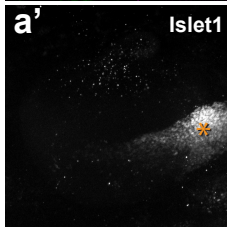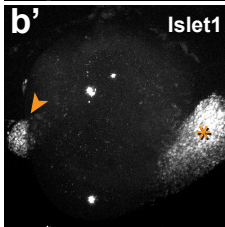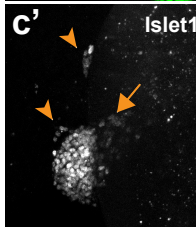

Supplement: supp [file elife_poa_e59540_Figure_3_figure_supplement_3.pdf › elife_poa_e59540_Figure_3_figure_supplement_3.pdf]

Control

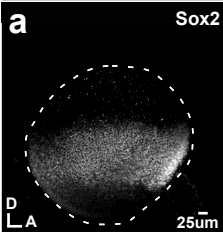

LiCl 5µM

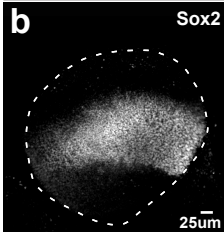

LiCl 15µM

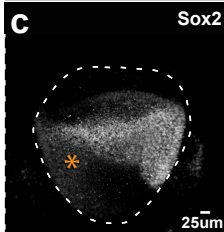

LiCl 25µM

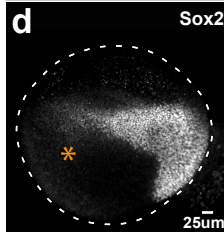

LiCl 35µM

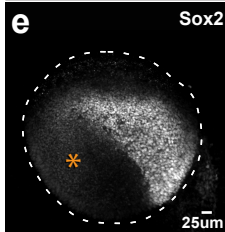

Supplement: supp [file elife_poa_e59540_Figure_6_figure_supplement_1.pdf › elife_poa_e59540_Figure_6_figure_supplement_1.pdf]
